# Supplementary material for: Recycling Polyethylene/Polyamide Multilayer Films with Poly(isoprene-g-Maleic Anhydride) Compatibilizer
Source: MDPI journal article supplement (doi:10.3390/polym16081079), 2024-04-12
Supplement: s1 [file s1]

## Supporting Information

# Recycling Polyethylene/Polyamide Multilayer Films with Poly(isoprene-g-Maleic Anhydride) Compatibilizer

Andreia Romeiro <sup>1</sup>, Cidália Teixeira <sup>2</sup>, Henrique Costa <sup>3</sup>, Jorge F. J. Coelho <sup>1</sup>  
and Arménio C. Serra <sup>1,\*</sup>

<sup>1</sup> University of Coimbra, Centre for Mechanical Engineering Materials and Processes, ARISE, Department of Chemical Engineering, Rua Silvio Lima- Polo II, 3030-790 Coimbra, Portugal; andreiar@eq.uc.pt (A.R.); jcoelho@eq.uc.pt (J.F.J.C.)

<sup>2</sup> Composit, lda, Estrada Nacional 3 km 28.6, Vila Chã de Ourique, 2071-621 Santarém, Portugal; cidalia.paula@isolago.com

<sup>3</sup> Inventive Matl, Casal dos Eucalptos, Casais Lagartos, 2070-389 Pontével, Portugal; incentivos@inventivemat.pt

\* Correspondence: aserra@eq.uc.pt

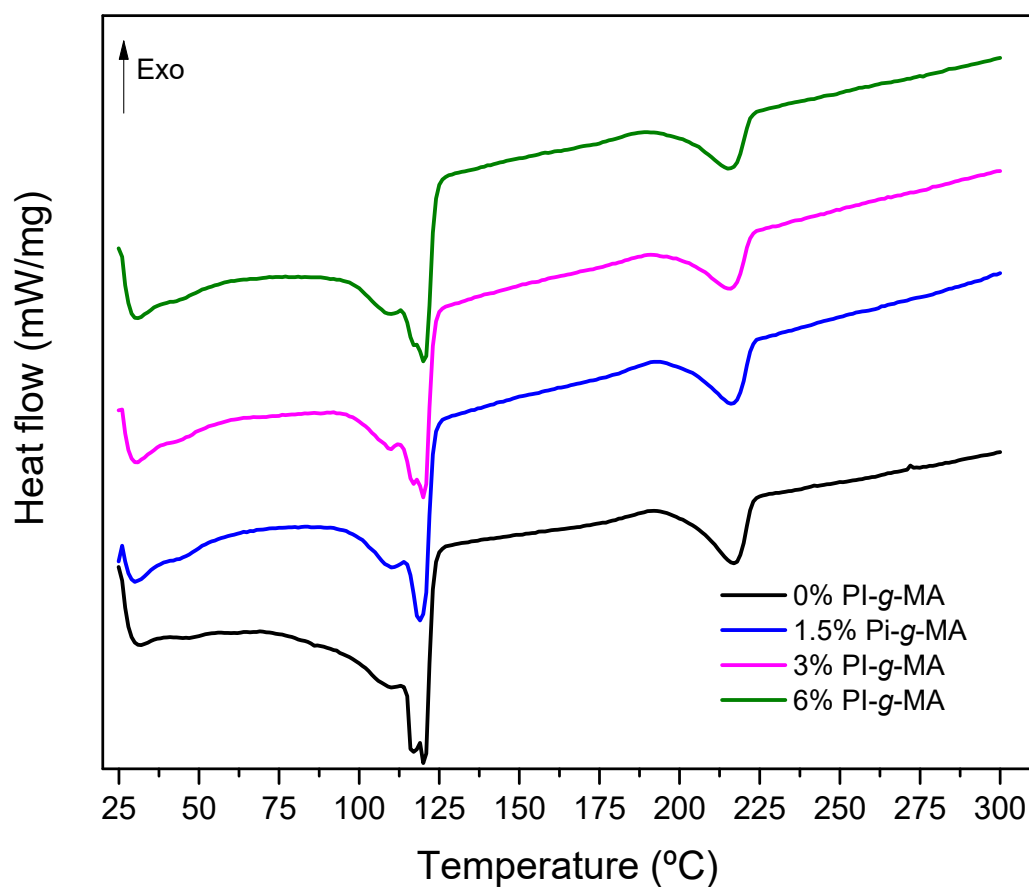

**Figure S1** DSC thermogram of 1<sup>st</sup> heat flux of films with different percentages of PI-g-MA.

**Table S1** DSC data of the 1<sup>st</sup> heat flux of the films with different percentages of PI-g-MA.

| Sample      | Polyethylene        |                       |                     |                       | Polyamide           |                       |                     |                       |
|-------------|---------------------|-----------------------|---------------------|-----------------------|---------------------|-----------------------|---------------------|-----------------------|
|             | T <sub>m</sub> (°C) | ΔH <sub>m</sub> (J/g) | T <sub>c</sub> (°C) | ΔH <sub>c</sub> (J/g) | T <sub>m</sub> (°C) | ΔH <sub>m</sub> (J/g) | T <sub>c</sub> (°C) | ΔH <sub>c</sub> (J/g) |
| 0% PI-g-MA  | 120                 | 108.5                 | 108                 | 55.2                  | 216                 | 81.5                  | 175                 | 48.0                  |
| 1.5%PI-g-MA | 118                 | 95.5                  | 107                 | 71.1                  | 216                 | 99.9                  | 172                 | 41.0                  |
| 3%PI-g-MA   | 120                 | 96.1                  | 107                 | 61.7                  | 215                 | 74.2                  | 168                 | 35.1                  |
| 6%PI-g-MA   | 120                 | 100.2                 | 107                 | 64.7                  | 215                 | 78.9                  | 168                 | 32.2                  |
